# Supplementary material for: Role of Sport Activity on Quality of Life in Charcot-Marie-Tooth 1A Patients
Source: MDPI journal article supplement (doi:10.3390/jcm11237032), 2022-11-28
Supplement: s1 [file s1]

## BEHAVIOURAL REGULATION IN EXERCISE QUESTIONNAIRE-2 (BREQ-2)

Markland & Tobin (2004) - Costa, Oliva, Cuzzocrea, & Larcan (2013)

Siamo interessati ad indagare le ragioni che spingono molte persone a impegnarsi nella pratica dell'esercizio fisico. Utilizzando la scala di seguito, la preghiamo di indicare in quale misura ciascuna delle seguenti affermazioni sia vera per lei. Non ci sono risposte giuste o sbagliate. Vogliamo semplicemente conoscere la sua opinione circa la pratica sportiva. Le sue risposte saranno trattate con la massima riservatezza e utilizzate esclusivamente per scopi di ricerca.

|    |                                                                                        | <div> <div>Non vero</div> <div>Qualche volta vero</div> <div>Molto vero</div> </div> |   |   |   |
|----|----------------------------------------------------------------------------------------|--------------------------------------------------------------------------------------|---|---|---|
| 1  | Faccio attività fisica perché gli altri dicono che dovrei farlo                        | 0                                                                                    | 1 | 2 | 3 |
| 2  | Mi sento in colpa quando non faccio esercizio fisico                                   | 0                                                                                    | 1 | 2 | 3 |
| 3  | Apprezzo i benefici dell’attività fisica                                               | 0                                                                                    | 1 | 2 | 3 |
| 4  | Faccio attività fisica perché è divertente                                             | 0                                                                                    | 1 | 2 | 3 |
| 5  | Non riesco a capire il motivo per cui dovrei fare attività fisica                      | 0                                                                                    | 1 | 2 | 3 |
| 6  | Faccio esercizio fisico perché i miei amici/familiari/ partner affermano che dovrei    | 0                                                                                    | 1 | 2 | 3 |
| 7  | Mi vergogno quando salto una sessione di allenamento                                   | 0                                                                                    | 1 | 2 | 3 |
| 8  | Per me è importante fare esercizio fisico con regolarità                               | 0                                                                                    | 1 | 2 | 3 |
| 9  | Non riesco a capire il motivo per cui dovrei preoccuparmi di fare attività fisica      | 0                                                                                    | 1 | 2 | 3 |
| 10 | Mi diverto mentre faccio attività fisica                                               | 0                                                                                    | 1 | 2 | 3 |
| 11 | Faccio attività fisica perche gli altri non sarebbero contenti di me se non lo facessi | 0                                                                                    | 1 | 2 | 3 |
| 12 | Non vedo la ragione per cui fare attività fisica                                       | 0                                                                                    | 1 | 2 | 3 |
| 13 | Mi sento depresso quando non mi alleno anche per un breve periodo di tempo             | 0                                                                                    | 1 | 2 | 3 |
| 14 | Credo sia importante fare lo sforzo di allenarsi regolarmente                          | 0                                                                                    | 1 | 2 | 3 |
| 15 | Ritengo che fare esercizio fisico sia una attività molto piacevole                     | 0                                                                                    | 1 | 2 | 3 |
| 16 | Mi sento sotto pressione da parte dei mie amici/familiari a fare attività fisica       | 0                                                                                    | 1 | 2 | 3 |
| 17 | Divento inquieto se non mi alleno con regolarità                                       | 0                                                                                    | 1 | 2 | 3 |
| 18 | Traggo piacere e soddisfazione nel fare esercizio fisico                               | 0                                                                                    | 1 | 2 | 3 |
| 19 | Penso che fare attività fisica sia una perdita di tempo                                | 0                                                                                    | 1 | 2 | 3 |

### **BREQ-2**

|                        |   |    |    |    |
|------------------------|---|----|----|----|
| Amotivation            | 5 | 9  | 12 | 19 |
| External regulation    | 1 | 6  | 11 | 16 |
| Introjected regulation | 2 | 7  | 13 |    |
| Identified regulation  | 3 | 8  | 14 |    |
| Intrinsic regulation   | 4 | 10 | 15 | 18 |

### **FREQUENZA DELL'ESERCIZIO FISICO**

- 1) Generalmente quanti giorni a settimana ti alleni?
- 2) Generalmente, quante ore al giorno ti alleni?
