# Supplementary material for: Role of Sport Activity on Quality of Life in Charcot-Marie-Tooth 1A Patients
Source: MDPI journal article supplement (doi:10.3390/jcm11237032), 2022-11-28
Supplement: s1 [file s1]

**BECK DEPRESSION INVENTORY**

*Nel questionario vi sono gruppi di dichiarazioni. Legga con attenzione ciascun gruppo e da ognuno scelga la dichiarazione che meglio descrive il modo in cui si è sentito durante l'ultima settimana, oggi compreso.*

|          |                                                                                                                                                                                                                                                                                                                                                               |
|----------|---------------------------------------------------------------------------------------------------------------------------------------------------------------------------------------------------------------------------------------------------------------------------------------------------------------------------------------------------------------|
| <b>A</b> | <input type="checkbox"/> (0) Non mi sento triste<br><input type="checkbox"/> (1) Mi sento triste<br><input type="checkbox"/> (2) Sono sempre triste e non riesco a star bene<br><input type="checkbox"/> (3) Sono così triste e infelice che non riesco a sopportarlo                                                                                         |
| <b>B</b> | <input type="checkbox"/> (0) Non sono particolarmente scoraggiato per il futuro<br><input type="checkbox"/> (1) Mi sento scoraggiato per il futuro<br><input type="checkbox"/> (2) Ho la sensazione di non desiderare nulla intensamente<br><input type="checkbox"/> (3) Ho la sensazione che il futuro è senza speranza e che le cose non possano migliorare |
| <b>C</b> | <input type="checkbox"/> (0) Non mi sento un fallito<br><input type="checkbox"/> (1) Ho la sensazione di aver fallito più di una persona media<br><input type="checkbox"/> (2) Se ripenso alla mia vita riesco a vedere solo una serie di fallimenti<br><input type="checkbox"/> (3) Ho la sensazione di essere un fallimento totale come persona             |
| <b>D</b> | <input type="checkbox"/> (0) Dalle cose traggo la stessa soddisfazione di prima<br><input type="checkbox"/> (1) Non mi godo le cose come facevo un tempo<br><input type="checkbox"/> (2) Non traggo più soddisfazione da nulla<br><input type="checkbox"/> (3) Sono insoddisfatto o annoiato di tutto                                                         |
| <b>E</b> | <input type="checkbox"/> (0) Non mi sento particolarmente colpevole<br><input type="checkbox"/> (1) Mi sento colpevole per buona parte del tempo<br><input type="checkbox"/> (2) Mi sento colpevole per la maggior parte del tempo<br><input type="checkbox"/> (3) Mi sento sempre colpevole                                                                  |
| <b>F</b> | <input type="checkbox"/> (0) Non ho la sensazione di star subendo una punizione<br><input type="checkbox"/> (1) Ho la sensazione che potrei subire una punizione<br><input type="checkbox"/> (2) Mi aspetto di essere punito<br><input type="checkbox"/> (3) Ho la sensazione di star subendo una punizione                                                   |
| <b>G</b> | <input type="checkbox"/> (0) Non mi sento deluso di me stesso<br><input type="checkbox"/> (1) Sono deluso di me stesso<br><input type="checkbox"/> (2) Sono disgustato di me stesso<br><input type="checkbox"/> (3) Odio me stesso                                                                                                                            |
| <b>H</b> | <input type="checkbox"/> (0) Non credo di essere peggiore di chiunque altro<br><input type="checkbox"/> (1) Mi critico per le mie debolezze o per i miei errori<br><input type="checkbox"/> (2) Mi rimprovero continuamente per le mie colpe<br><input type="checkbox"/> (3) Mi rimprovero per tutte le cose brutte che accadono                              |
| <b>I</b> | <input type="checkbox"/> (0) Non penso mai ad uccidermi<br><input type="checkbox"/> (1) Mi vengono idee di uccidermi ma non le realizzerei mai<br><input type="checkbox"/> (2) Vorrei uccidermi<br><input type="checkbox"/> (3) Mi ucciderei se potessi                                                                                                       |
| <b>L</b> | <input type="checkbox"/> (0) Non piango più del solito<br><input type="checkbox"/> (1) Ora piango più che in passato<br><input type="checkbox"/> (2) Ora piango continuamente<br><input type="checkbox"/> (3) Un tempo riuscivo a piangere, ma ora non ci riesco anche se ne ho voglia                                                                        |

|          |                                                                                                                                                                                                                                                                                                                                                                                                          |
|----------|----------------------------------------------------------------------------------------------------------------------------------------------------------------------------------------------------------------------------------------------------------------------------------------------------------------------------------------------------------------------------------------------------------|
| <b>M</b> | <input type="checkbox"/> (0) Non sono più irritato del solito<br><input type="checkbox"/> (1) Mi infastidisco e mi irrito più facilmente di un tempo<br><input type="checkbox"/> (2) Ora sono continuamente irritato<br><input type="checkbox"/> (3) Non mi irrito affatto per le cose che un tempo mi irritavano                                                                                        |
| <b>N</b> | <input type="checkbox"/> (0) Non ho perso interesse per le altre persone<br><input type="checkbox"/> (1) Ora ho meno interesse che nel passato per le altre persone<br><input type="checkbox"/> (2) Ho perso la maggior parte dell'interesse per le altre persone<br><input type="checkbox"/> (3) Ho perso completamente interesse per le altre persone                                                  |
| <b>O</b> | <input type="checkbox"/> (0) Prendo decisioni quasi come al solito<br><input type="checkbox"/> (1) Cerco di rimandare le decisioni più spesso di un tempo<br><input type="checkbox"/> (2) Ho maggiore difficoltà di un tempo a prendere decisioni<br><input type="checkbox"/> (3) Non riesco più a prendere alcuna decisione                                                                             |
| <b>P</b> | <input type="checkbox"/> (0) Non credo di avere un aspetto peggiore del solito<br><input type="checkbox"/> (1) Sono preoccupato di apparire vecchio o non attraente<br><input type="checkbox"/> (2) Sento che il mio aspetto ha subito cambiamenti permanenti che mi rendono meno attraente<br><input type="checkbox"/> (3) Ho la sensazione di essere brutto                                            |
| <b>Q</b> | <input type="checkbox"/> (0) Riesco a lavorare quasi altrettanto bene che in passato<br><input type="checkbox"/> (1) Devo sforzarmi di più per cominciare a fare qualcosa<br><input type="checkbox"/> (2) Devo spronare fortemente me stesso per fare qualunque cosa<br><input type="checkbox"/> (3) Non riesco a lavorare per niente                                                                    |
| <b>R</b> | <input type="checkbox"/> (0) Dormo bene come al solito<br><input type="checkbox"/> (1) Non dormo bene come prima<br><input type="checkbox"/> (2) Mi sveglio una o due ore prima del solito e mi riesce difficile riaddormentarmi<br><input type="checkbox"/> (3) Mi sveglio parecchie ore prima del solito e non riesco più ad addormentarmi                                                             |
| <b>S</b> | <input type="checkbox"/> (0) Non mi sento più stanco del solito<br><input type="checkbox"/> (1) Mi stanco più facilmente di un tempo<br><input type="checkbox"/> (2) Mi stanco a fare qualunque cosa<br><input type="checkbox"/> (3) Sono troppo stanco per fare alcunché                                                                                                                                |
| <b>T</b> | <input type="checkbox"/> (0) Non ho meno appetito del solito<br><input type="checkbox"/> (1) Non ho un buon appetito come una volta<br><input type="checkbox"/> (2) Ora ho molto meno appetito<br><input type="checkbox"/> (3) Non ho più appetito per niente                                                                                                                                            |
| <b>U</b> | <input type="checkbox"/> (0) Di recente non sono calato molto di peso<br><input type="checkbox"/> (1) Ho perso più di due chili<br><input type="checkbox"/> (2) Ho perso più di quattro chili<br><input type="checkbox"/> (3) Ho perso più di sei chili                                                                                                                                                  |
| <b>V</b> | <input type="checkbox"/> (0) Non mi preoccupo della mia salute più del solito<br><input type="checkbox"/> (1) Mi preoccupo per le fitte e i dolori o per il mal di stomaco o per la stitichezza<br><input type="checkbox"/> (2) Mi preoccupo talmente di come mi sento che mi è difficile pensare ad altro<br><input type="checkbox"/> (3) Sono così preoccupato di come mi sento che non penso ad altro |
| <b>Z</b> | <input type="checkbox"/> (0) Non ho notato di recente alcun cambiamento nel mio interesse per il sesso<br><input type="checkbox"/> (1) Ho meno interesse di una volta per il sesso<br><input type="checkbox"/> (2) Ho molto meno interesse per il sesso<br><input type="checkbox"/> (3) Ho perso completamente interesse per il sesso                                                                    |
