# Supplementary material for: Role of Sport Activity on Quality of Life in Charcot-Marie-Tooth 1A Patients
Source: MDPI journal article supplement (doi:10.3390/jcm11237032), 2022-11-28
Supplement: s1 [file s1]

## SELF-ESTEEM SCALE DI ROSENBERG

**Prezza, M., Trombaccia, F. R., & Armento, L. (1997)**

**Istruzioni:** La presente scala consiste in 10 affermazioni. Per favore legga attentamente le affermazioni e per ognuna di esse scelga quella che meglio descrive i sentimenti nutriti verso la sua persona. Per favore indichi quanto è d'accordo con ciascuna affermazione.

Perfettamente d'accordo

D'accordo

Non molto d'accordo

Disaccordo

|                                                                         | Perfettamente<br>d'accordo | D'accordo | Non<br>molto<br>d'accordo | disaccordo |
|-------------------------------------------------------------------------|----------------------------|-----------|---------------------------|------------|
| 1. Nell'insieme sono contento/a di me                                   |                            |           |                           |            |
| 2. A volte penso di non valere niente                                   |                            |           |                           |            |
| 3. Ritengo di avere un certo numero di pregi                            |                            |           |                           |            |
| 4. Sono capace di conseguire successi, con la maggior parte della gente |                            |           |                           |            |
| 5. Ho l'impressione che non ci sia molto in me di cui andar fiero/a     |                            |           |                           |            |
| 6. A volte mi sento veramente inutile                                   |                            |           |                           |            |
| 7. Penso di valere almeno quanto gli altri                              |                            |           |                           |            |
| 8. Mi piacerebbe poter avere più rispetto per me stesso/a               |                            |           |                           |            |
| 9. Tutto considerato penso di essere un/a fallito/a                     |                            |           |                           |            |
| 10. Ho un'opinione positiva di me stesso/a                              |                            |           |                           |            |

### Scoring:

Items 2, 5, 6, 8, 9 are reverse scored. Give "Strongly Disagree" 1 point, "Disagree" 2 points, "Agree" 3 points, and "Strongly Agree" 4 points. Sum scores for all ten items. Keep scores on a continuous scale. Higher scores indicate higher self-esteem

- 10-16 Bassa stima di Sé
- 17-33 Media stima di Sé
- 34-40 Alta stima di Sé

### Bibliografia

**Prezza, M., Trombaccia, F. R., & Armento, L. (1997). La scala dell'autostima di Rosenberg: Traduzione e validazione italiana. Bollettino di Psicologia Applicata, 223, 35-44.**
