# Supplementary material for: Role of Sport Activity on Quality of Life in Charcot-Marie-Tooth 1A Patients
Source: MDPI journal article supplement (doi:10.3390/jcm11237032), 2022-11-28
Supplement: s1 [file s1]

## ID-PAIN QUESTIONARIO

PARTECIPANTE .....

DATA .....

SEGNARE “**SI**” NEI CAMPI CHE CORRISPONDONO AL DOLORE PROVATO NELL’  
ULTIMA SETTIMANA E “**NO**” IN QUELLI CHE NON CORRISPONDONO:

### DOMANDE:

- |                                                             |         |        |
|-------------------------------------------------------------|---------|--------|
| 1. Il dolore era simile a punture di aghi e spilli?         | SI (1)  | NO (0) |
| 2. Il dolore era di tipo bruciante/urente?                  | SI (1)  | NO (0) |
| 3. Il dolore era di tipo addormentamento?                   | SI (1)  | NO (0) |
| 4. Il dolore era simile ad una scossa elettrica?            | SI (1)  | NO (0) |
| 5. Il dolore peggiora al tatto con i vestiti o le lenzuola? | SI (1)  | NO (0) |
| 6. Il dolore è limitato alle articolazioni?                 | SI (-1) | NO (0) |
