# Supplementary material for: Role of Sport Activity on Quality of Life in Charcot-Marie-Tooth 1A Patients
Source: J Clin Med. 2022 Nov 28;11(23):7032. doi: 10.3390/jcm11237032 (PMC9740468; doi:10.3390/jcm11237032)
Supplement: Supplementary file 1 [file jcm-11-07032-s001.zip]

Archive with 6 entries (6 files):
- BDI.pdf
- BREQ-2_pdf.pdf
- ID PAIN.pdf
- NPSI.pdf
- SELF-ESTEEM_ROSENBERG.pdf
- SF36 Questionario.pdf
